# Supplementary material for: Sperm Dysfunction in the Testes and Epididymides due to Overweight and Obesity Is Not Caused by Oxidative Stress
Source: Hindawi journal article supplement (doi:10.1155/2022/3734572), 2022-10-10

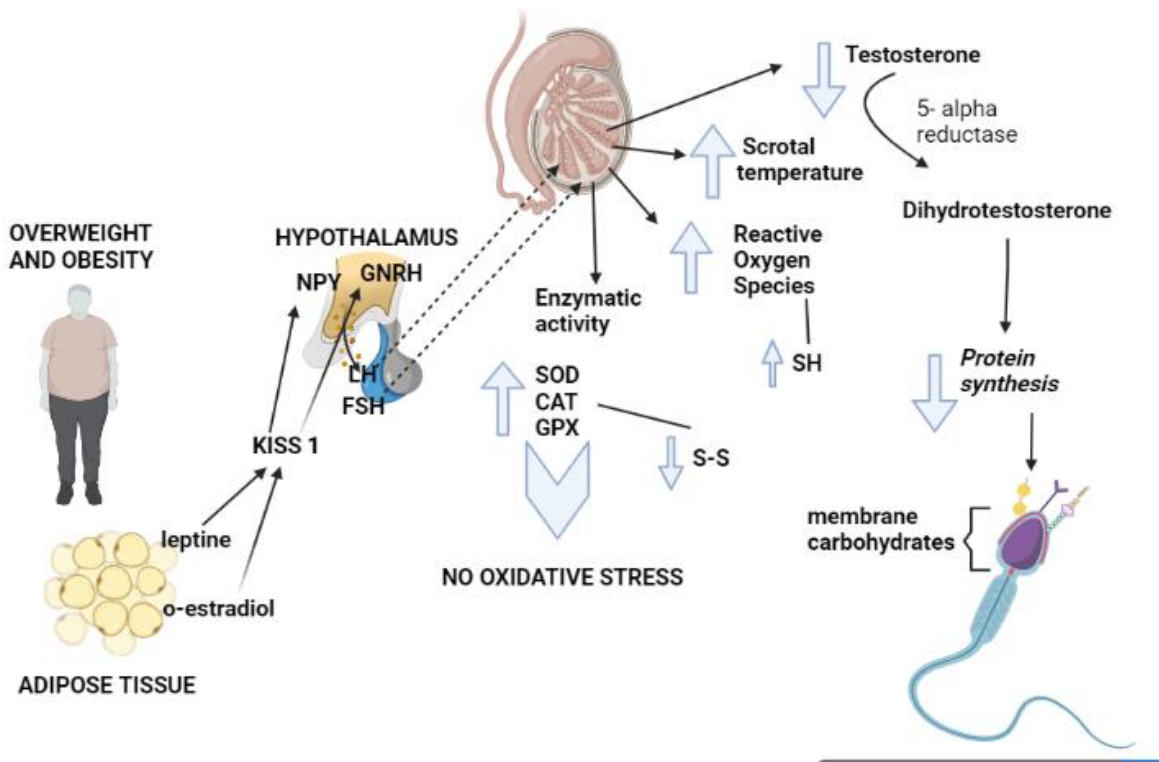

Supplement: f1 [file 3734572.f1.pdf]
